# Supplementary material for: Cost-Effectiveness Analysis of Atrial Fibrillation Screening for Stroke Prevention in China: A Markov Model
Source: Research Square preprint supplement (doi:10.21203/rs.3.rs-110782/v1), 2020-11-25
Supplement: Supplementary file 1 [file 2468bfbbe04314a1d2d75d01.docx]

Supplemental table The incidence of AF, IS, ICH, the prevalence of AF and utilities of sinus rhythm population from 55-89 years in China *

| Age group (year) | AF incidence  (/100 thousands) | AF prevalence  (/100 thousands) | IS incidence  (/100 thousands) | ICH incidence  (/100 thousands) | Utility values of Sinus rhythm |
| --- | --- | --- | --- | --- | --- |
| 50-54 | 41.90 | 337.53 | 208.35 | 101.74 | 0.9345 |
| 55-59 | 74.77 | 627.87 | 332.88 | 135.89 | 0.9296 |
| 60-64 | 122.76 | 1106.14 | 505.56 | 181.36 | 0.9373 |
| 65-69 | 184.44 | 1859.90 | 724.49 | 234.74 | 0.9331 |
| 70-74 | 243.79 | 2898.99 | 992.16 | 306.90 | 0.9219 |
| 75-79 | 300.34 | 4182.25 | 1331.63 | 397.76 | 0.8965 |
| 80-84 | 317.65 | 5568.70 | 1640.04 | 568.63 | 0.8844 |
| 85-89 | 300.28 | 6634.59 | 1901.47 | 817.44 | 0.8191 |

* AF, atrial fibrillation; IS, ischemic stroke; ICH, intracerebral hemorrhage.

Supplemental figure Tornado diagram for annual AF screening in 75-year-old cohort (all variables included).
